# Supplementary material
Source: Springer Nature journal article supplement (https://www.springermedizin.de/resource/supplementary/12885_2009_1949_MOESM7_ESM.pdf/9460162)
Supplement: MOESM7 [file 9460162]

## Concordance between first diagnosis and the expert review

Table 5: Patient characteristics per subgroup

| <b>Patient characteristics.</b> |                    |               |              |
|---------------------------------|--------------------|---------------|--------------|
|                                 | requested SO group | Control group | <i>p</i>     |
| Included patients               | 188 (100%)         | 178 (100%)    |              |
| <i>Sex</i>                      |                    |               |              |
| <b>Males</b>                    | 102 (54.3%)        | 82 (46.1%)    | <i>0.117</i> |
| <b>Females</b>                  | 86 (45.7%)         | 96 (53.9%)    |              |
| <i>Age (years)</i>              |                    |               |              |
| <b>Mean</b>                     | 57.9               | 59.6          | <i>0.359</i> |
| <b>Median</b>                   | 62                 | 61            |              |
| <b>Range</b>                    | [15-86]            | [18-92]       |              |
| <i>Types of tumor</i>           |                    |               |              |
| <b>Soft tissue</b>              | 117 (62.2%)        | 98 (55.1%)    | <i>0.128</i> |
| <b>Bone tissue</b>              | 13 (6.9%)          | 8 (4.5%)      |              |
| <b>Visceral tissue</b>          | 58 (30.9%)         | 72 (40.4%)    |              |
| <i>Localization</i>             |                    |               |              |
| <b>Upper limb</b>               | 15 (8.%)           | 19 (10.7%)    | <i>0.313</i> |
| <b>Lower limb</b>               | 45 (23.9%)         | 31 (17.4%)    |              |
| <b>Abdomen</b>                  | 44 (23.4%)         | 57 (32%)      |              |
| <b>Thorax</b>                   | 31 (16.5%)         | 23 (12.9%)    |              |
| <b>Head and Neck</b>            | 16 (8.5%)          | 13 (7.3%)     |              |
| <b>Pelvis</b>                   | 25 (13.3%)         | 20 (11.2%)    |              |
| <b>Retroperitoneum</b>          | 10 (5.3%)          | 11 (6.2%)     |              |
| <b>Axial skeleton</b>           | 1 (0.5%)           | 0 (0%)        |              |
| <b>Multiple localizations</b>   | 1 (0.5%)           | 4 (2.2%)      |              |
| <i>Grade</i>                    |                    |               |              |
| <b>Grade I</b>                  | 47 (25%)           | 38 (21.3%)    | <i>0.716</i> |
| <b>Grade II</b>                 | 36 (19.1%)         | 41 (23%)      |              |
| <b>Grade III</b>                | 50 (26.6%)         | 47 (26.4%)    |              |
| <b>Non applicable</b>           | 52 (27.2%)         | 51 (28.7%)    |              |
| <b>Unknown</b>                  | 3 (1.6%)           | 1 (0.6%)      |              |

## Concordance between first diagnosis and the expert review

| <i>histological subtypes</i>           |            |            |                   |
|----------------------------------------|------------|------------|-------------------|
| <b>Liposarcoma</b>                     | 37 (19.7%) | 19 (10.7%) |                   |
| <b>NOS Sarcoma</b>                     | 32 (17.0%) | 20 (11.2%) |                   |
| <b>GIST</b>                            | 23 (12.2%) | 42 (23.6%) |                   |
| <b>Myxofibrosarcoma</b>                | 9 (4.8%)   | 3 (1.7%)   |                   |
| <b>Leiomyosarcoma</b>                  | 7 (3.7%)   | 19 (10.7%) |                   |
| <b>PNET / Ewing</b>                    | 6 (3.2%)   | 2 (1.1%)   |                   |
| <b>Rhabdomyosarcoma</b>                | 6 (3.2%)   | 2 (1.1%)   | <i>&lt;0.001.</i> |
| <b>Chondrosarcoma</b>                  | 6 (3.2%)   | 3 (1.7%)   |                   |
| <b>Dermatofibrosarcoma protuberans</b> | 4 (2.1%)   | 16 (9.0%)  |                   |
| <b>Uterine Leiomyosarcoma</b>          | 5 (2.7%)   | 7 (3.9%)   |                   |
| <b>Osteosarcoma</b>                    | 5 (2.7%)   | 6 (3.4%)   |                   |
| <b>Kaposi Sarcoma</b>                  | 5 (2.7%)   | 13 (7.3%)  |                   |
| <b>Synovialosarcoma</b>                | 5 (2.7%)   | 2 (1.1%)   |                   |
| <b>Angiosarcoma</b>                    | 3 (1.6%)   | 7 (3.9%)   |                   |
| <b>Unclassified malignant tumor</b>    | 7 (3.7%)   | 7 (3.9%)   |                   |
| <b>Other</b>                           | 28 (14.9%) | 10 (5.6%)  |                   |

Table 5: Patient characteristics per subgroup
